# Supplementary material for: Future changes in compound explosive cyclones and atmospheric rivers in the North Atlantic
Source: Copernicus journal article supplement (doi:10.5194/esd-16-169-2025), 2025-01-21
Supplement: Supplementary file 1 [file esd-16-169-2025-supplement.pdf]

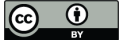

*Supplement of*

## **Future changes in compound explosive cyclones and atmospheric rivers in the North Atlantic**

**Ferran Lopez-Marti et al.**

*Correspondence to:* Ferran Lopez-Marti ([ferran.lopez-marti@geo.uu.se](mailto:ferran.lopez-marti@geo.uu.se))

The copyright of individual parts of the supplement might differ from the article licence.

1       **S1. JUSTIFICATION FOR THE CHOICE OF 1500 km RADIUS in identifying**  
2       **atmospheric rivers around a cyclone**

3  
4       We have analysed the distribution of the closest points of atmospheric rivers (AR) around the  
5       cyclone centre (Fig. S1) and found that most of them fall within the east-southeast quadrant of  
6       the 1500 km circle. This is expected, as most ARs that are dynamically associated with a  
7       cyclone are located to the southeast of the cyclone centre, linked to the WCB and feeder  
8       airstream. This pattern is further illustrated in Figure A2, where the histogram shows that most  
9       ARs are in the southeast quadrant. If we expand this radius to 2500 km, there is a shift in AR  
10      occurrences toward the southwest and northwest quadrants of the cyclone (Fig. S2), making it  
11      less likely that these ARs are dynamically linked to the cyclone. Therefore, we conclude that  
12      1500 km represents a good compromise between maximizing the number of possible cases  
13      (statistics) and selecting those that are dynamically linked (dynamics).

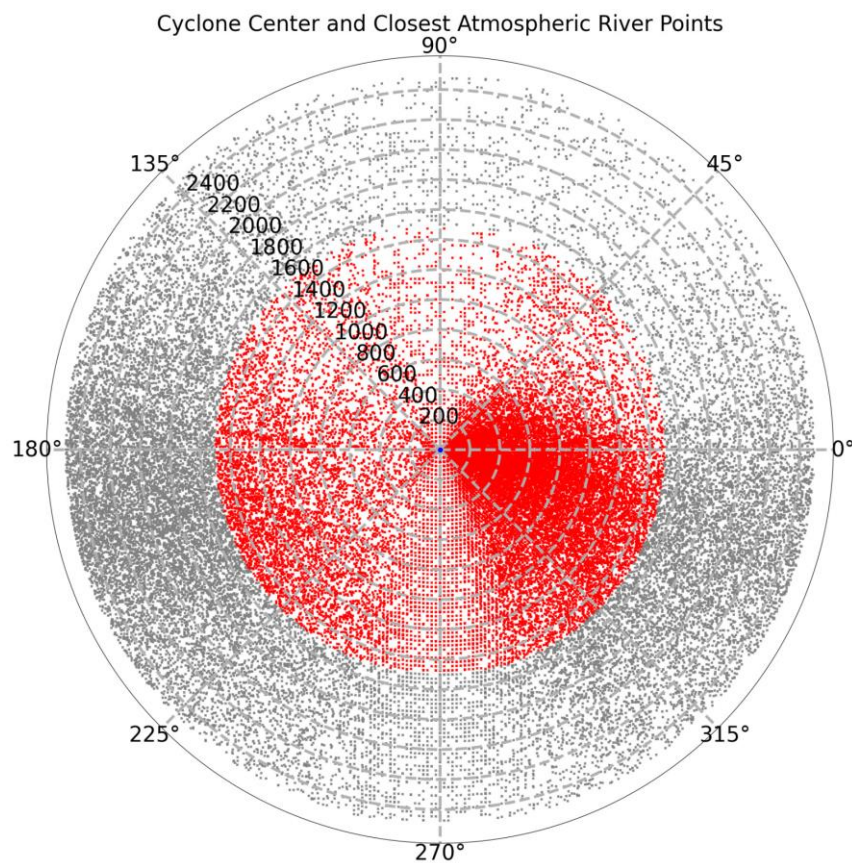

14  
15      Figure S1. Closest atmospheric river (AR) points found around cyclones, both detected using  
16      ERA5 data. Points in red indicate those found within a 1500 km circle from the cyclone center,  
17      and in gray those found up to 2500 km away.

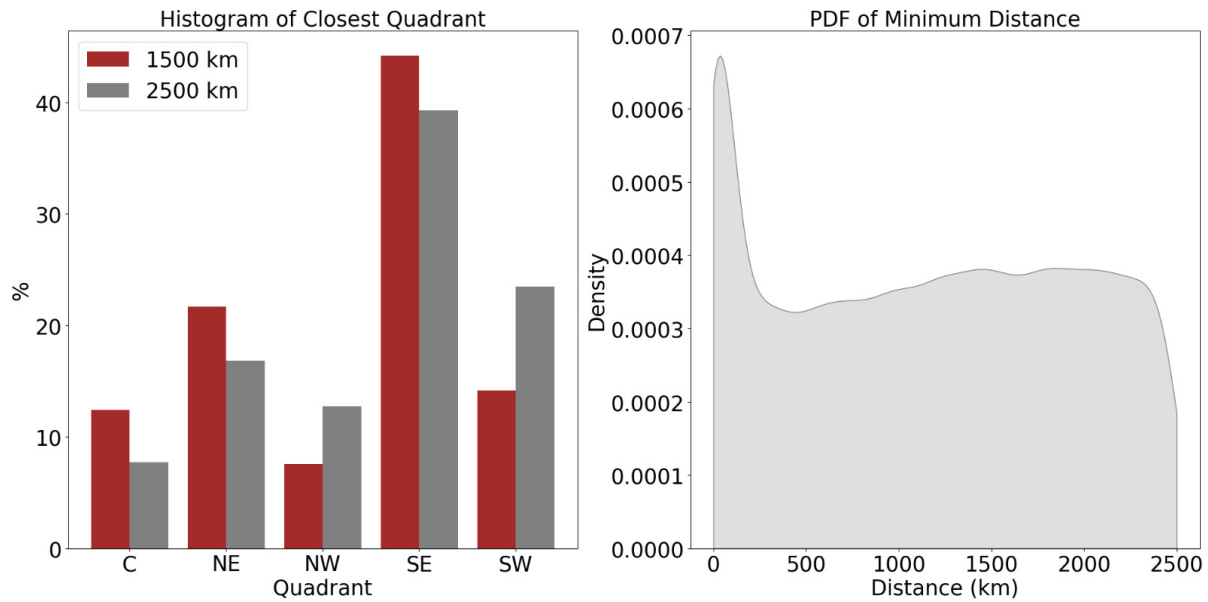

18

19 Figure S2. Percentage of occurrence (left) of the cyclone quadrant in which the closest  
 20 atmospheric river (AR) was found within a 1500 km circle (brown) and a 2500 km circle (gray),  
 21 for ERA5 data. The right figure shows the probability distribution function (PDF) of the  
 22 distance, in kilometers, between the cyclone center and the closest point of the AR.

23

24 **S2. RESOLUTION SENSITIVITY TEST OF ERA5: Impact on the present**  
 25 **concurrences of AR with ECs and non-ECs**

26 We performed a sensitivity test where the SLP and IVT fields for ERA5 are interpolated to a  
 27 1°, 1.5° and 2° regular lon-lat grid (similar range to the CMIP6 models resolutions). Then the  
 28 same methodology described in the manuscript is applied to the regridded ERA5. We analysed  
 29 the sensitivity of the resolution in ERA5 to the concurrence of ARs with ECs and non-ECs as  
 30 it is done in Fig. 4 a,b (Figures S3 and S4). The rate of coincidence decreases as we reduce the  
 31 resolution of ERA5 for both EC and non-ECs in the same way. The spread of the regridded  
 32 ERA5 (1°, 1.5° and 2°) is slightly smaller than the spread of the CMIP6 models, but the CMIP6  
 33 models do not show lower rate of coincidence for the coarser model resolution. For example,  
 34 EC-Earth, the model with the highest resolution, shows the lowest concurrence rate of CMIP6  
 35 models, or MPI-LH with the lowest resolution has higher concurrences than average. With this  
 36 sensitivity test we can say that the CMIP6 model spread is not driven by the model resolution  
 37 since they show different signals. The model spread is driven by the inherent nature of each  
 38 model (including its resolution), as well as internal variability, and we study it by accounting  
 39 for the resolution as a characteristic of each model.

40

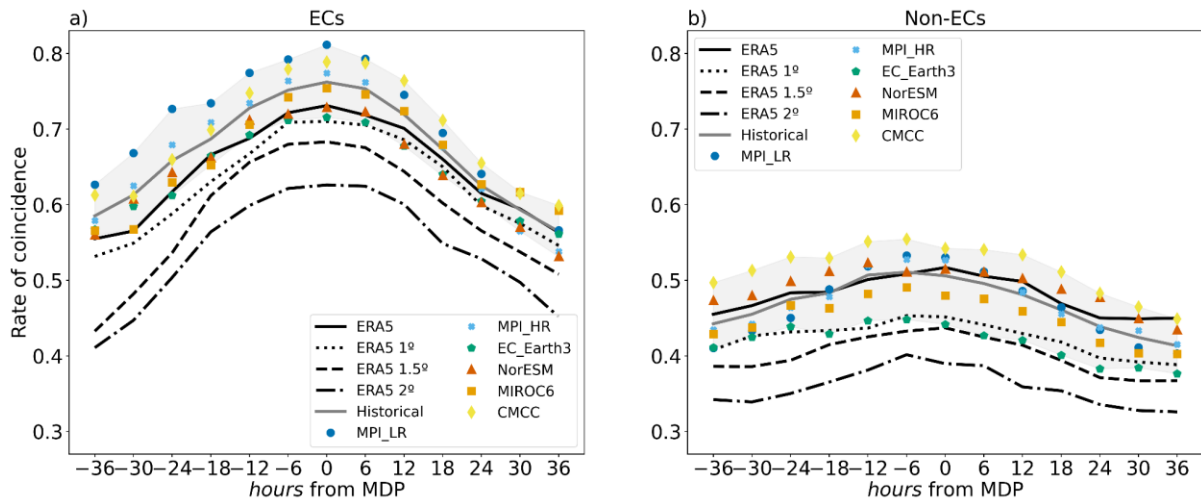

41

42 Figure S3. Same as Figure 4a,b of the manuscript but with additional curves for ERA5  
 43 interpolated to different resolutions ( $1^\circ$ ,  $1.5^\circ$  and  $2^\circ$ ).

44 We also performed a resolution sensitivity test to the IVT-max results by reproducing Fig. 6  
 45 a,b with the regridded ERA5 (Figure S4). The IVT-max values decrease when lowering the  
 46 resolution in ERA5 for both ECs and non-ECs, the CMIP6 models more or less align with this  
 47 since higher resolution models show higher IVT-max than the CMPI6 mean and the models  
 48 with lower resolution show lower IVT-max than the CMPI6 mean. Despite of that, the IVT-  
 49 max CMIP6 model spread is at least 3 times larger than the regridded ERA5 ( $1^\circ$ ,  $1.5^\circ$  and  $2^\circ$ ).  
 50 Again the model spread is driven by the inherent nature of each model (including its resolution)  
 51 rather than only the resolution of the model.

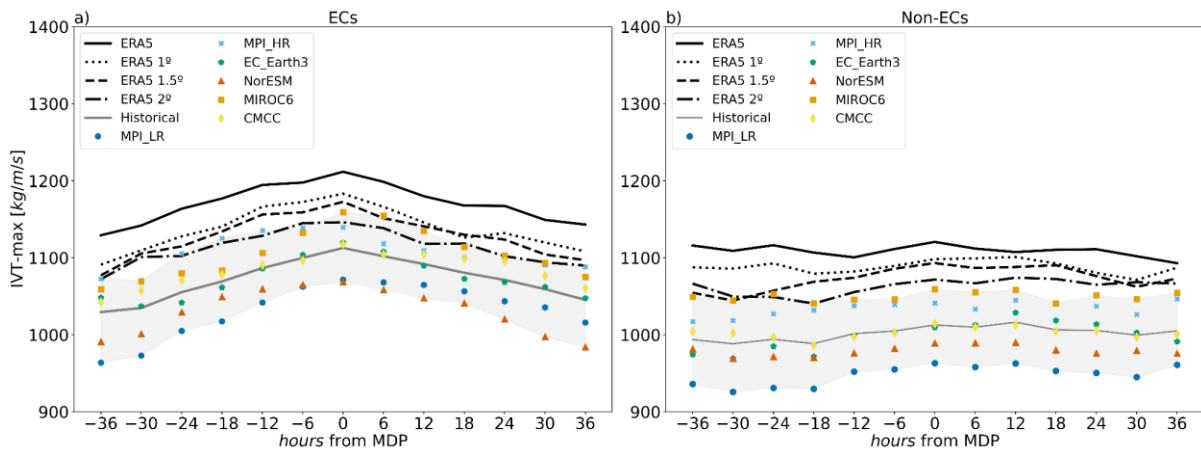

52

53 Figure S4. Same as Figure 6a,b of the manuscript but only for historical with additional curves  
 54 for ERA5 interpolated to different resolutions ( $1^\circ$ ,  $1.5^\circ$  and  $2^\circ$ ).

55 We show in Table S1 the number of AR tracks and EC and non-EC tracks for the regridded  
 56 ERA5 following the same methodology as in Table A2 and A3. The number of ARs tracks  
 57 only shows a 5% difference when regridding ERA5 to  $2^\circ$ , suggesting that the “one grid”  
 58 threshold for the AR tracking has almost no effect on the results. The total number of EC and  
 59 non-EC tracks show a larger decrease for ERA5  $2^\circ$  but not as much as for ERA5  $1^\circ$  and  $1.5^\circ$ ,  
 60 similar to what we observe between MPI HR and MPI LR. For the other models, the differences  
 61 in number of cyclone tracks is not proportional to the resolution.

| #Tracks    | ERA5 | ERA5<br>1° | ERA5<br>1.5° | ERA5<br>2° | MPI-<br>HR | MPI-<br>LR | EC-<br>Earth3 | NorES<br>M | MIRO<br>C6 | CMCC<br>-ESM2 |
|------------|------|------------|--------------|------------|------------|------------|---------------|------------|------------|---------------|
| AR         | 1224 | 1225       | 1214         | 1165       | 1219       | 1286       | 1187          | 1235       | 1152       | 1186          |
| non-<br>EC | 3200 | 3391       | 3240         | 3092       | 3046       | 2387       | 2927          | 3594       | 3424       | 3530          |
| EC         | 1372 | 1307       | 1262         | 1158       | 1168       | 870        | 1283          | 1193       | 879        | 1076          |

62 Table S1. Number of AR tracks and EC and non-EC tracks following the same methodology  
63 as in Table A2 and A3 but for the regridded ERA5.

64 We acknowledge that differences in model resolution introduce uncertainty, but we consider  
65 this an inherent uncertainty of the models themselves. Moreover, when analysing differences  
66 between periods, we compare the multi-model means, which is equivalent to comparing each  
67 model to itself and then averaging the differences. We never perform a direct comparison  
68 across different models. Our main goal here is to assess changes between historical and future  
69 scenarios and not model evaluation with ERA5.
